# Supplementary material
Source: MDPI journal article supplement (https://www.mdpi.com/2504-5377/2/1/10)
Supplement: s1 [file s1]

**Supporting Information**

**Evaluation of Cyclodextrins as Environmentally Friendly Wettability Modifiers for Enhanced Oil Recovery**

**Adriana Falconi Telles da Cruz 1, Ramon Domingues Sanches 1, Caetano Rodrigues Miranda 2 and Sergio Brochsztain 1,***

1 Centro de Engenharia, Modelagem e Ciências Sociais Aplicadas, Universidade Federal do ABC, Santo André, 09210-580, Brazil; adri.falconii@hotmail.com (A.F.T.d.C.); rads_rds@hotmail.com (R.D.S.)

2 Instituto de Física, Universidade de São Paulo, São Paulo, 05508-090, Brazil; caetano.miranda@gmail.com

***** Correspondence: sergio.brochsztain@ufabc.edu.br; Tel.: +55-11-4996-8260

**Figure S1.** Interfacial tension (IFT) between a drop of dodecane and α-CD solutions of different concentrations in brine (0.6 M NaCl) followed as a function of time. Inset: Interfacial tension (measured at t = 400 sec) between a drop of dodecane and α-CD solutions as a function of [α-CD]. The line represents the linear regression of the data.

**Figure S2.** Dynamic behavior of the contact angles followed as a function of time for *n*-dodecane drops immersed in aqueous saline solution (0.6 M NaCl) containing β-CD and in contact with C18-quartz. (●) Brine only. (●) 0.5% β-CD. (●) 1.0% β-CD. (●) 1.5% β-CD. (●) 2.0% β-CD. [CD] are given in w/v percent.

**Figure S3.** Two different drops of *n*-dodecane in contact with C18-quartz and immersed in aqueous saline solution (0.6 M NaCl) containing 1.5% (w/v) β-CD. There was a slight trend to spread in the first few minutes (oil started advancing over a previously water-covered surface), but as the skin developed the drop shape got frozen.


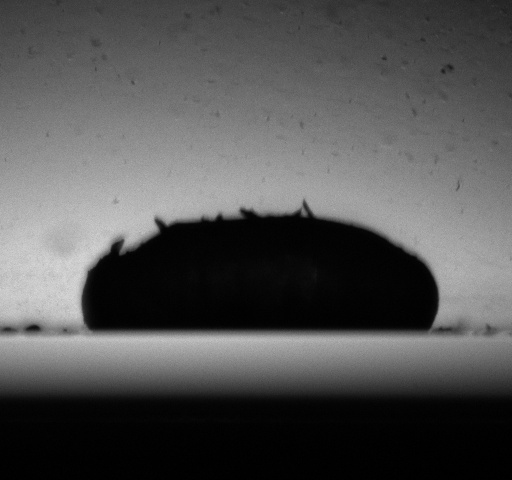


**A**


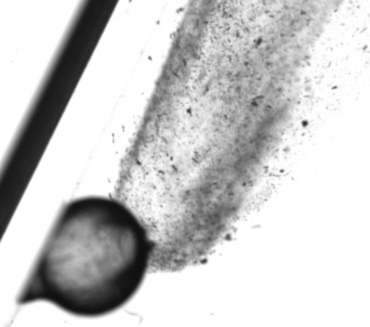


**B**

**Figure S4.** Drop of *n*-dodecane in contact with C18-quartz and immersed in aqueous saline solution (0.6 M NaCl) containing 5% (w/v) α-CD. (A) Drop aged for 30 min. Crystals of the inclusion complexes can be seen protruding from the interface. (B) Tilting plate experiment, showing the relay of a flow of particles from the drop surface.
